# Supplementary material for: Aging Brain from a Network Science Perspective: Something to Be Positive About?
Source: PLoS One. 2013 Nov 6;8(11):e78345. doi: 10.1371/journal.pone.0078345 (PMC3819386; doi:10.1371/journal.pone.0078345)
Supplement: Table S8 — Multiple linear regressions predicting SPWM reaction time from global and local efficiency in the fronto-parietal network. (DOCX) [file pone.0078345.s017.docx]

**Table S8**

| ROIs from the **Fronto-parietal Network**  DV: **SPWM RT (spatial working memory speed)** | | | | | | | | | |
| --- | --- | --- | --- | --- | --- | --- | --- | --- | --- |
|  |  | Global Efficiency | | | | Local Efficiency | | | |
|  |  | 250 | | 300 | | 250 | | 300 | |
|  |  | β | R2 | β | R2 | β | R2 | β | R2 |
| Step 1 |  |  | .62 |  | .62 |  | .62 |  | .62 |
|  | Age | -.25* |  | -.25* |  | -.25* |  | -.25* |  |
|  | Sex | .13 |  | .13 |  | .13 |  | .13 |  |
|  | Single RT | .61** |  | .61** |  | .61** |  | .61** |  |
|  |  |  |  |  |  |  |  |  |  |
| Step 2 | SupPar |  | .63 |  | .64 |  | .63 |  | .62 |
|  | Age | -.28* |  | -.30* |  | -.23† |  | -.26* |  |
|  | Sex | .15† |  | .16† |  | .14 |  | .13 |  |
|  | Single RT | .64*** |  | .64*** |  | .58*** |  | .61*** |  |
|  | ROI | .11 |  | .15 |  | .04 |  | .08 |  |
|  | Age x ROI | .01 |  | -.01 |  | -.15 |  | -.06 |  |
| Step 2 | LatOcc |  | .63 |  | .63 |  | .64 |  | .65 |
|  | Age | -.27* |  | -.28* |  | -.21† |  | -.17 |  |
|  | Sex | .13 |  | .14 |  | .14 |  | .17 |  |
|  | Single RT | .64*** |  | .65*** |  | .58*** |  | .60*** |  |
|  | ROI | .06 |  | .07 |  | -.13 |  | -.11 |  |
|  | Age x ROI | .04 |  | .07 |  | -.01 |  | -.09 |  |
| Step 2 | LingFus |  | .63 |  | .64 |  | .63 |  | .67* |
|  | Age | -.28* |  | -.29* |  | -.20 |  | -.06 |  |
|  | Sex | .14 |  | .14 |  | .15 |  | .17 |  |
|  | Single RT | .66*** |  | .69*** |  | .60*** |  | .65*** |  |
|  | ROI | .11 |  | .15 |  | -.06 |  | -.22* |  |
|  | Age x ROI | .04 |  | .06 |  | .07 |  | -.08 |  |

β p-value: †p<.10, *p<.05, **p<.01, ***p<.001; R2 p-value symbol represents statistical significance of R Square change.
